# Supplementary material for: The Toll-Like Receptor 5 Agonist Entolimod Mitigates Lethal Acute Radiation Syndrome in Non-Human Primates
Source: PubMed Central journal article supplement (PMC4569586; doi:10.1371/journal.pone.0135388), 2015-09-14
Supplement: pone.0135388.s001.pdf [file pone.0135388.s001.pdf]

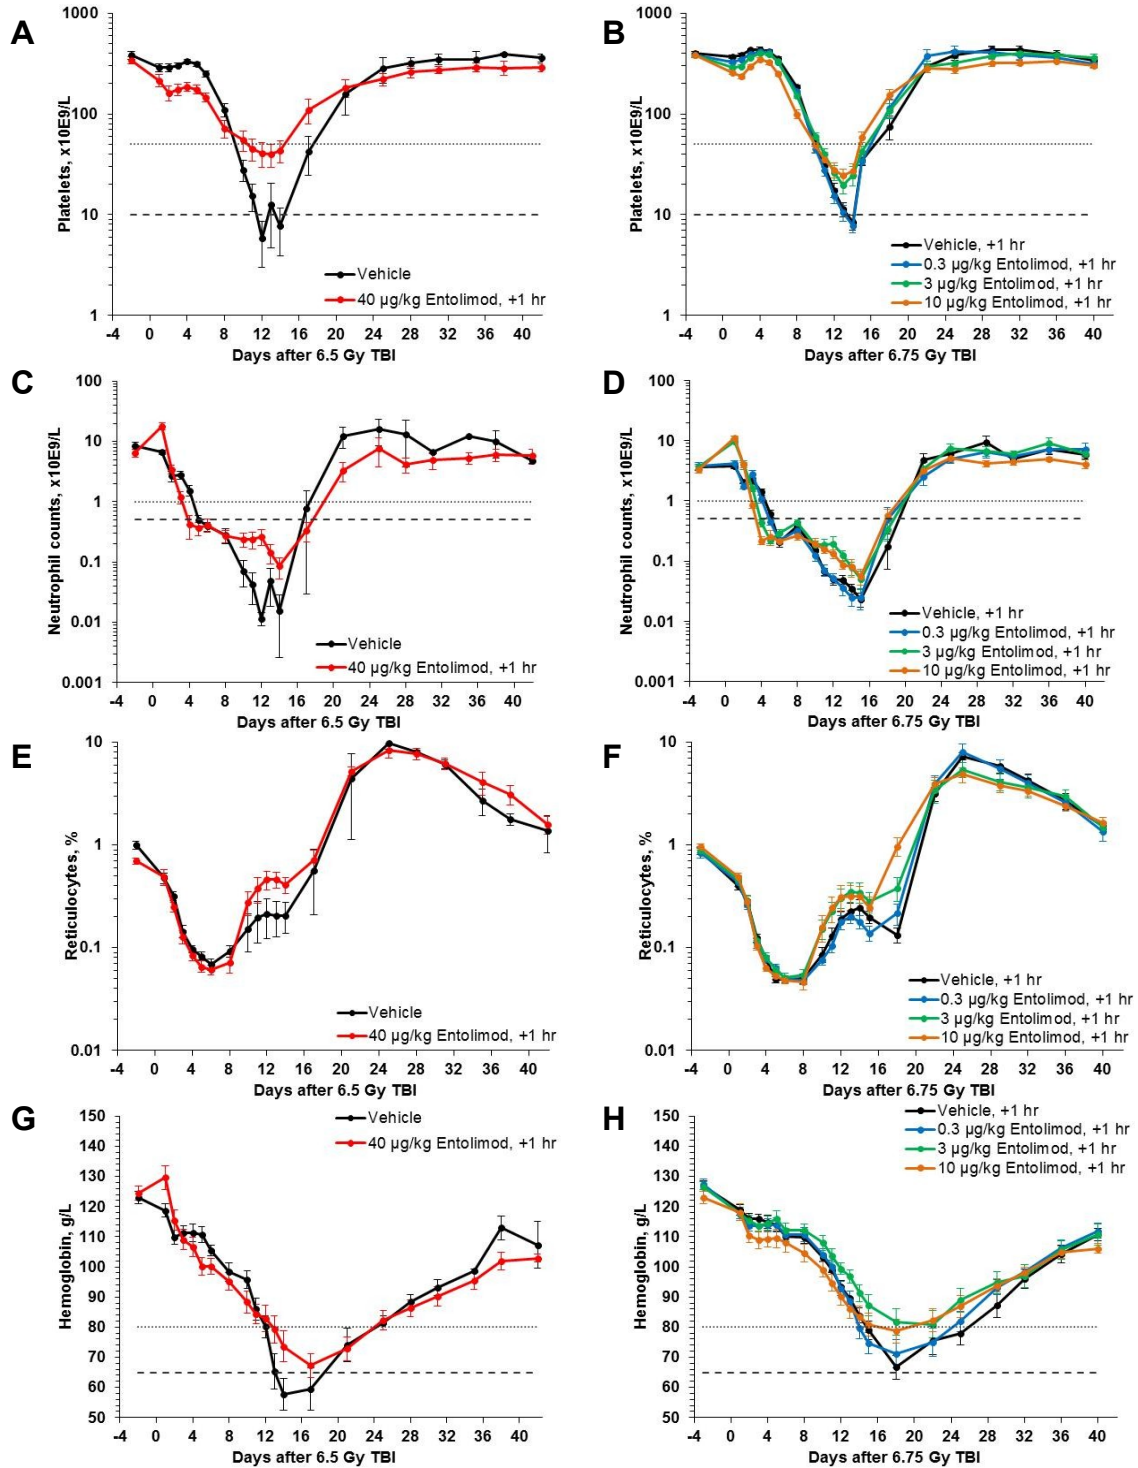

**S1 Fig. Accelerated recovery of the peripheral blood cellularity and hemoglobin content in NHPs irradiated with  $\text{LD}_{50/40}$  or  $\text{LD}_{75/40}$  of TBI and treated with different doses of entolimod 1 hour later.**

**A, C, E, G:** study Rs-03; N=10. **B, D, F, H:** study Rs-09; N=18. Cytopenia/anemia thresholds: dotted lines - Grade 3 (platelets  $<50,000/\mu\text{L}$ ; neutrophils  $<1,000/\mu\text{L}$ ; hemoglobin  $<80$  g/L); dashed lines - Grade 4 (platelets  $<10,000/\mu\text{L}$ ; neutrophils  $<500/\mu\text{L}$ ; hemoglobin  $<65$  g/L). Error bars represent standard errors.
