# Supplementary material for: The Toll-Like Receptor 5 Agonist Entolimod Mitigates Lethal Acute Radiation Syndrome in Non-Human Primates
Source: PubMed Central journal article supplement (PMC4569586; doi:10.1371/journal.pone.0135388), 2015-09-14
Supplement: pone.0135388.s002.pdf [file pone.0135388.s002.pdf]

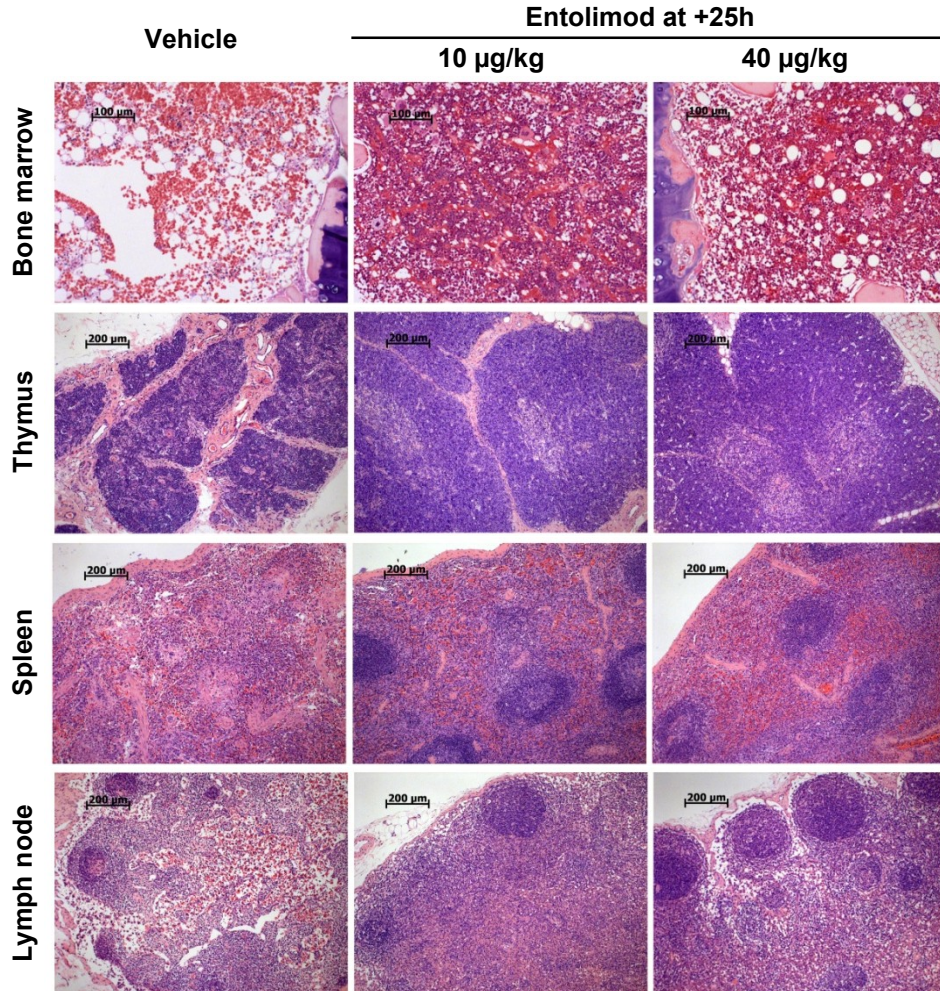

**S2 Fig. Comparable restorative effects of single 10 or 40  $\mu\text{g}/\text{kg}$  entolimod treatments given 25 hours after TBI on morphological recovery of hematopoietic and lymphoid organs in NHPs 40 days after irradiation with  $\text{LD}_{50/40}$  of TBI.**

Representative histological images (hematoxylin-eosin staining) of sternum bone marrow sections, thymuses, spleens and mesenteric lymph nodes from animals that survived to study termination on Day 40 post-TBI (study Rs-14). Scale bars: 100  $\mu\text{m}$  for bone marrow, 200  $\mu\text{m}$  for thymus, spleen, and lymph node.
