# Supplementary material for: The Toll-Like Receptor 5 Agonist Entolimod Mitigates Lethal Acute Radiation Syndrome in Non-Human Primates
Source: PubMed Central journal article supplement (PMC4569586; doi:10.1371/journal.pone.0135388), 2015-09-14
Supplement: pone.0135388.s003.pdf [file pone.0135388.s003.pdf]

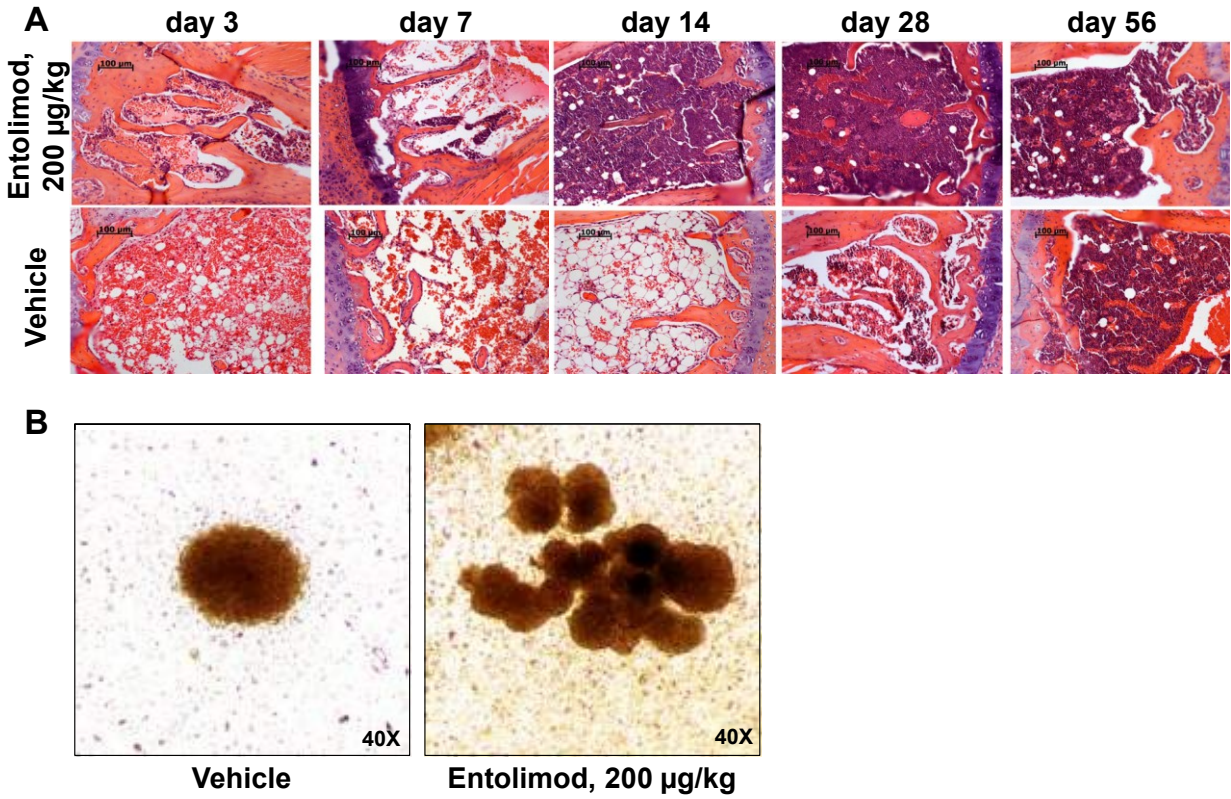

**S3 Fig. Accelerated kinetics of bone marrow regeneration and proliferating phenotype of CFU-GM colonies in entolimod-treated CD2F1 mice after LD<sub>50/30</sub> of TBI and entolimod treatment.**

Male CD2F1 mice were irradiated with 9 Gy TBI and injected i.m. with vehicle or 200 µg/kg entolimod 25 h later. Groups of 5 mice were sacrificed at the indicated time points for evaluation of histopathology and bone marrow clonogenic potential. **A:** Representative microphotographs of hematoxylin-eosin-stained bone marrow sections. Scale bar – 100 µm. **B:** Appearance of CFU-GM colonies grown from bone marrow collected on day 7 after TBI.
