# Supplementary material for: The Toll-Like Receptor 5 Agonist Entolimod Mitigates Lethal Acute Radiation Syndrome in Non-Human Primates
Source: PubMed Central journal article supplement (PMC4569586; doi:10.1371/journal.pone.0135388), 2015-09-14
Supplement: pone.0135388.s006.pdf [file pone.0135388.s006.pdf]

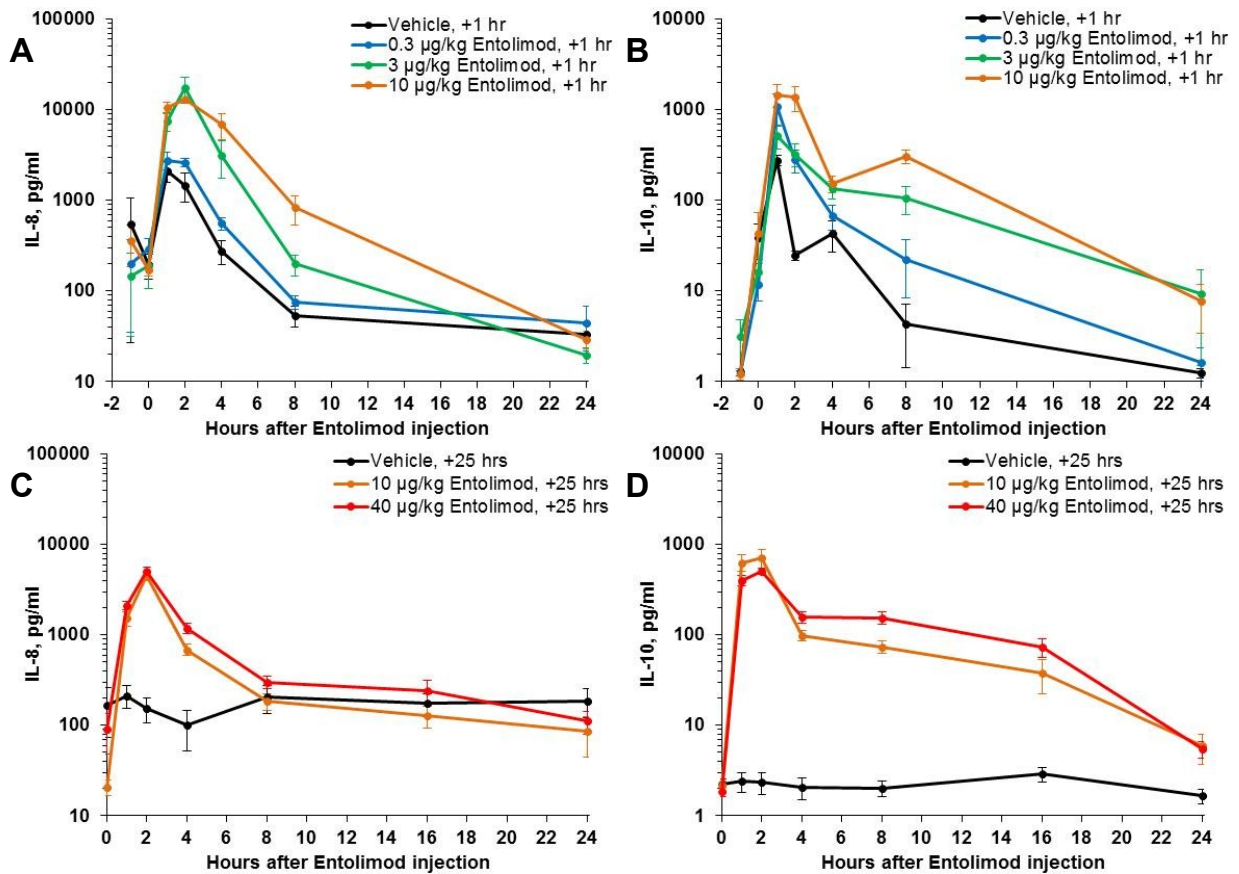

**S6 Fig. Effect of single dose entolimod treatment on IL-8 and IL-10 levels in the peripheral blood of NHPs irradiated with LD<sub>50/40</sub> or LD<sub>75/40</sub> doses of TBI.**

**A, B:** Effects of different entolimod doses administered 1 h after TBI (study Rs-09; N=18). **C, D:** Effect of different entolimod doses administered 25 h after TBI (study Rs-14; N=10). Error bars represent standard errors.
