# Supplementary material for: The Toll-Like Receptor 5 Agonist Entolimod Mitigates Lethal Acute Radiation Syndrome in Non-Human Primates
Source: PubMed Central journal article supplement (PMC4569586; doi:10.1371/journal.pone.0135388), 2015-09-14
Supplement: pone.0135388.s007.pdf [file pone.0135388.s007.pdf]

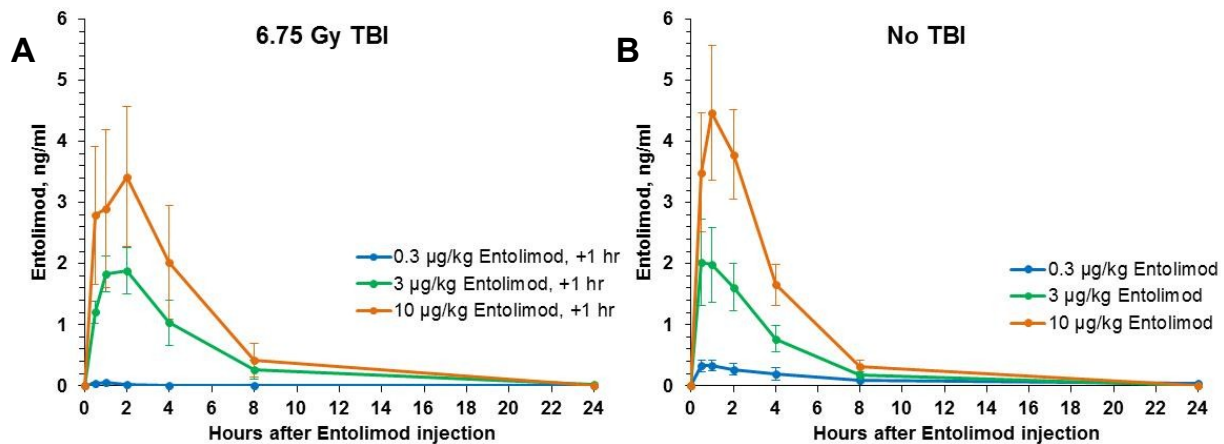

**S7 Fig. Entolimod concentrations in the peripheral blood of NHPs (irradiated with LD<sub>50/40</sub> (6.75 Gy) TBI or non-irradiated) at different times after single intramuscular injection of the indicated drug doses.**

**A:** Entolimod levels after injection of different doses 1 h after TBI (study Rs-09; N=18). **B:** Entolimod levels after injection of the same dose levels in non-irradiated NHPs (study 04-Rs-04; N=6). This study is not described in the current manuscript and data are shown for comparison. Error bars represent standard errors.
