# Supplementary material for: The Toll-Like Receptor 5 Agonist Entolimod Mitigates Lethal Acute Radiation Syndrome in Non-Human Primates
Source: PubMed Central journal article supplement (PMC4569586; doi:10.1371/journal.pone.0135388), 2015-09-14
Supplement: pone.0135388.s010.pdf [file pone.0135388.s010.pdf]

**S2 Table. Incidence and duration of absolute neutropenia (neutrophil count <10 cells/ $\mu$ L) in lethally irradiated NHPs treated with vehicle or entolimod**

| Study                                                    | Irradiation dose                                  | Entolimod dose, $\mu$ g/kg | Injection time(s) relative to TBI, h | Group size (n) | Mean % live days $\pm$ SE with absolute neutropenia | P-value <sup>A</sup> | Incidence of absolute neutropenia | P-value <sup>B</sup> |
|----------------------------------------------------------|---------------------------------------------------|----------------------------|--------------------------------------|----------------|-----------------------------------------------------|----------------------|-----------------------------------|----------------------|
| Rs-03                                                    | $\sim$ LD <sub>75/40</sub> (6.5 Gy) <sup>C</sup>  | 0 (vehicle)                | +1                                   | 10             | 16% $\pm$ 4%                                        | -                    | 80%                               | -                    |
|                                                          |                                                   | 40                         | +1                                   | 10             | 1% $\pm$ 1%                                         | <b>0.002</b>         | 0%                                | <b>0.001</b>         |
| Rs-06                                                    | $\sim$ LD <sub>75/40</sub> (6.5 Gy) <sup>C</sup>  | 0 (vehicle)                | +16                                  | 8              | 15% $\pm$ 3%                                        | -                    | 88%                               | -                    |
|                                                          |                                                   | 40                         | +16                                  | 12             | 3% $\pm$ 2%                                         | <b>0.01</b>          | 25%                               | <b>0.02</b>          |
|                                                          |                                                   | 40                         | +25                                  | 10             | 6% $\pm$ 2%                                         | <b>0.03</b>          | 50%                               | >0.05                |
|                                                          |                                                   | 40                         | +48                                  | 12             | 8% $\pm$ 3%                                         | 0.11                 | 50%                               | >0.05                |
| Rs-09                                                    | $\sim$ LD <sub>50/40</sub> (6.75 Gy) <sup>D</sup> | 0 (vehicle)                | +1                                   | 18             | 10% $\pm$ 2%                                        | -                    | 78%                               | -                    |
|                                                          |                                                   | 0.3                        | +1                                   | 18             | 11% $\pm$ 3%                                        | 0.74                 | 72%                               | >0.05                |
|                                                          |                                                   | 3                          | +1                                   | 18             | 7% $\pm$ 2%                                         | 0.39                 | 50%                               | >0.05                |
|                                                          |                                                   | 10                         | +1                                   | 18             | 4% $\pm$ 1%                                         | <b>0.02</b>          | 56%                               | >0.05                |
| Rs-14                                                    | $\sim$ LD <sub>50/40</sub> (6.75 Gy) <sup>D</sup> | 0 (vehicle)                | +25                                  | 10             | 6% $\pm$ 2%                                         | -                    | 50%                               | -                    |
|                                                          |                                                   | 10                         | +25                                  | 10             | 2% $\pm$ 1%                                         | 0.19                 | 30%                               | >0.05                |
|                                                          |                                                   | 40                         | +25                                  | 10             | 5% $\pm$ 3%                                         | 0.84                 | 50%                               | >0.05                |
| Pooled vehicle vs. $\geq$ 10 $\mu$ g/kg entolimod, +25 h | $\sim$ LD <sub>50-75/40</sub> (6.5-6.75 Gy)       | 0 (vehicle) <sup>E</sup>   | +1 - +25                             | 46             | 11% $\pm$ 1%                                        | -                    | 74%                               | -                    |
|                                                          |                                                   | $\geq$ 10 <sup>F</sup>     | +25                                  | 30             | 4% $\pm$ 1%                                         | <b>0.0003</b>        | 43%                               | <b>0.01</b>          |

<sup>A</sup> P-value by Student's t-test (two-tailed) against vehicle groups in individual studies or in pooled group analysis

<sup>B</sup> P-value by Fisher's exact test (two-tailed) against vehicle groups in individual studies or in pooled group analysis

<sup>C</sup> Source I: Sichuan Atomic Energy Institute, cylindrical bundle of Co-60 rods

<sup>D</sup> Source II: Sichuan Atomic Energy Institute, vertical array of Co-60 rods

<sup>E</sup> Vehicle-treated animals from studies Rs-03, Rs-06, Rs-09, and Rs-14

<sup>F</sup> Entolimod-treated animals from studies Rs-06 and Rs-14
