# Supplementary material for: The Toll-Like Receptor 5 Agonist Entolimod Mitigates Lethal Acute Radiation Syndrome in Non-Human Primates
Source: PubMed Central journal article supplement (PMC4569586; doi:10.1371/journal.pone.0135388), 2015-09-14
Supplement: pone.0135388.s011.pdf [file pone.0135388.s011.pdf]

**S3 Table. Incidence and duration of Grade 4 thrombocytopenia (platelet count <10,000 cells/ $\mu$ L) in lethally irradiated NHPs treated with vehicle or entolimod**

| Study                                                    | Irradiation dose                                  | Entolimod dose, $\mu$ g/kg | Injection time(s) relative to TBI, h | Group size (n) | Mean % live days $\pm$ SE with Grade 4 thrombocytopenia | P-value <sup>A</sup> | Incidence of Grade 4 thrombocytopenia | P-value <sup>B</sup> |
|----------------------------------------------------------|---------------------------------------------------|----------------------------|--------------------------------------|----------------|---------------------------------------------------------|----------------------|---------------------------------------|----------------------|
| Rs-03                                                    | $\sim$ LD <sub>75/40</sub> (6.5 Gy) <sup>C</sup>  | 0 (vehicle)                | +1                                   | 10             | 20% $\pm$ 4%                                            | -                    | 80%                                   | -                    |
|                                                          |                                                   | 40                         | +1                                   | 10             | 2% $\pm$ 1%                                             | <b>0.003</b>         | 20%                                   | <b>0.02</b>          |
| Rs-06                                                    | $\sim$ LD <sub>75/40</sub> (6.5 Gy) <sup>C</sup>  | 0 (vehicle)                | +16                                  | 8              | 26% $\pm$ 5%                                            | -                    | 88%                                   | -                    |
|                                                          |                                                   | 40                         | +16                                  | 12             | 6% $\pm$ 3%                                             | <b>0.003</b>         | 33%                                   | <b>0.03</b>          |
|                                                          |                                                   | 40                         | +25                                  | 10             | 11% $\pm$ 4%                                            | <b>0.02</b>          | 60%                                   | >0.05                |
|                                                          |                                                   | 40                         | +48                                  | 12             | 13% $\pm$ 4%                                            | <b>0.04</b>          | 58%                                   | >0.05                |
| Rs-09                                                    | $\sim$ LD <sub>50/40</sub> (6.75 Gy) <sup>D</sup> | 0 (vehicle)                | +1                                   | 18             | 9% $\pm$ 2%                                             | -                    | 72%                                   | -                    |
|                                                          |                                                   | 0.3                        | +1                                   | 18             | 9% $\pm$ 2%                                             | 0.89                 | 67%                                   | >0.05                |
|                                                          |                                                   | 3                          | +1                                   | 18             | 5% $\pm$ 2%                                             | 0.09                 | 44%                                   | >0.05                |
|                                                          |                                                   | 10                         | +1                                   | 18             | 3% $\pm$ 2%                                             | <b>0.03</b>          | 28%                                   | <b>0.02</b>          |
| Rs-14                                                    | $\sim$ LD <sub>50/40</sub> (6.75 Gy) <sup>D</sup> | 0 (vehicle)                | +25                                  | 10             | 20% $\pm$ 5%                                            | -                    | 80%                                   | -                    |
|                                                          |                                                   | 10                         | +25                                  | 10             | 2% $\pm$ 1%                                             | <b>0.004</b>         | 40%                                   | >0.05                |
|                                                          |                                                   | 40                         | +25                                  | 10             | 4% $\pm$ 2%                                             | <b>0.01</b>          | 30%                                   | >0.05                |
| Pooled vehicle vs. $\geq$ 10 $\mu$ g/kg entolimod, +25 h | $\sim$ LD <sub>50-75/40</sub> (6.5-6.75 Gy)       | 0 (vehicle) <sup>E</sup>   | +1 - +25                             | 46             | 17% $\pm$ 2%                                            | -                    | 78%                                   | -                    |
|                                                          |                                                   | $\geq$ 10 <sup>F</sup>     | +25                                  | 30             | 5% $\pm$ 2%                                             | <b>&lt;0.0001</b>    | 43%                                   | <b>0.003</b>         |

<sup>A</sup> P-value by Student's t-test (two-tailed) against vehicle groups in individual studies or in pooled group analysis

<sup>B</sup> P-value by Fisher's exact test (two-tailed) against vehicle groups in individual studies or in pooled group analysis

<sup>C</sup> Source I: Sichuan Atomic Energy Institute, cylindrical bundle of Co60 rods

<sup>D</sup> Source II: Sichuan Atomic Energy Institute, vertical array of Co60 rods

<sup>E</sup> Vehicle-treated animals from studies Rs-03, Rs-06, Rs-09, and Rs-14

<sup>F</sup> Entolimod-treated animals from studies Rs-06 and Rs-14
