# Supplementary material for: The Toll-Like Receptor 5 Agonist Entolimod Mitigates Lethal Acute Radiation Syndrome in Non-Human Primates
Source: PubMed Central journal article supplement (PMC4569586; doi:10.1371/journal.pone.0135388), 2015-09-14
Supplement: pone.0135388.s012.pdf [file pone.0135388.s012.pdf]

**S4 Table. Incidence and duration of Grade 4 anemia (hemoglobin level <65g/L) in lethally irradiated NHPs treated with vehicle or entolimod**

| Study                                         | Irradiation dose                               | Entolimod dose, µg/kg    | Injection time(s) relative to TBI, h | Group size (n) | Mean % live days ± SE with Grade 4 anemia | P-value <sup>A</sup> | Incidence of Grade 4 anemia | P-value <sup>B</sup> |
|-----------------------------------------------|------------------------------------------------|--------------------------|--------------------------------------|----------------|-------------------------------------------|----------------------|-----------------------------|----------------------|
| Rs-03                                         | ~LD <sub>75/40</sub><br>(6.5 Gy) <sup>C</sup>  | 0 (vehicle)              | +1                                   | 10             | 11%±3%                                    | -                    | 70%                         | -                    |
|                                               |                                                | 40                       | +1                                   | 10             | 6%±3%                                     | 0.29                 | 20%                         | >0.05                |
| Rs-06                                         | ~LD <sub>75/40</sub><br>(6.5 Gy) <sup>C</sup>  | 0 (vehicle)              | +16                                  | 8              | 8%±5%                                     | -                    | 25%                         | -                    |
|                                               |                                                | 40                       | +16                                  | 12             | 2%±2%                                     | 0.25                 | 8%                          | >0.05                |
|                                               |                                                | 40                       | +25                                  | 10             | 6%±4%                                     | 0.78                 | 20%                         | >0.05                |
|                                               |                                                | 40                       | +48                                  | 12             | 1%±1%                                     | 0.20                 | 0%                          | >0.05                |
| Rs-09                                         | ~LD <sub>50/40</sub><br>(6.75 Gy) <sup>D</sup> | 0 (vehicle)              | +1                                   | 18             | 9%±3%                                     | -                    | 44%                         | -                    |
|                                               |                                                | 0.3                      | +1                                   | 18             | 7%±2%                                     | 0.49                 | 33%                         | >0.05                |
|                                               |                                                | 3                        | +1                                   | 18             | 6%±3%                                     | 0.50                 | 17%                         | >0.05                |
|                                               |                                                | 10                       | +1                                   | 18             | 6%±3%                                     | 0.41                 | 17%                         | >0.05                |
| Rs-14                                         | ~LD <sub>50/40</sub><br>(6.75 Gy) <sup>D</sup> | 0 (vehicle)              | +25                                  | 10             | 12%±4%                                    | -                    | 60%                         | -                    |
|                                               |                                                | 10                       | +25                                  | 10             | 1%±1%                                     | <b>0.01</b>          | 20%                         | >0.05                |
|                                               |                                                | 40                       | +25                                  | 10             | 1%±1%                                     | <b>0.02</b>          | 10%                         | >0.05                |
| Pooled vehicle vs. ≥10 µg/kg entolimod, +25 h | ~LD <sub>50-75/40</sub><br>(6.5-6.75 Gy)       | 0 (vehicle) <sup>E</sup> | +1 - +25                             | 46             | 10%±2%                                    | -                    | 50%                         | -                    |
|                                               |                                                | ≥10 <sup>F</sup>         | +25                                  | 30             | 3%±2%                                     | <b>0.003</b>         | 17%                         | <b>0.004</b>         |

<sup>A</sup> P-value by Student's t-test (two-tailed) against vehicle group

<sup>B</sup> P-value by Fisher's exact test (two-tailed) against vehicle group

<sup>C</sup> Source I: Sichuan Atomic Energy Institute, cylindrical central set of Co60 rods

<sup>D</sup> Source II: Sichuan Atomic Energy Institute, vertical array of Co60 rods

<sup>E</sup> Vehicle-treated animals from studies Rs-03, Rs-06, Rs-09, and Rs-14

<sup>F</sup> Entolimod-treated animals from studies Rs-06 and Rs-14
