# Supplementary material for: The Toll-Like Receptor 5 Agonist Entolimod Mitigates Lethal Acute Radiation Syndrome in Non-Human Primates
Source: PubMed Central journal article supplement (PMC4569586; doi:10.1371/journal.pone.0135388), 2015-09-14
Supplement: pone.0135388.s013.pdf [file pone.0135388.s013.pdf]

**S5 Table. Semi-quantitative histological evaluation of hematopoietic/lymphoid organs from NHPs that survived to day 40 after 6.75 Gy TBI followed by vehicle or entolimod treatment (study Rs-14)**

| Organ/tissue               | Mean score <sup>A</sup> ± SE |                 |                | P-value vs. vehicle <sup>B</sup> |               |
|----------------------------|------------------------------|-----------------|----------------|----------------------------------|---------------|
|                            | Vehicle (N=4)                | Entolimod, +25h |                | Entolimod, +25h                  |               |
|                            |                              | 10 µg/kg (N=10) | 40 µg/kg (N=8) | 10 µg/kg                         | 40 µg/kg      |
| <b>Bone marrow</b>         | 2.2±0.7                      | 3.7±0.1         | 3.9±0.0        | 0.1                              | 0.1           |
| <b>Thymus <sup>C</sup></b> | 2.1±0.1                      | 3.5±0.2         | 3.8±0.1        | <b>0.007</b>                     | <b>0.002</b>  |
| <b>Spleen</b>              | 1.0±0.3                      | 2.7±0.2         | 3.6±0.1        | <b>0.004</b>                     | <b>0.001</b>  |
| <b>Lymph node</b>          | 1.2±0.2                      | 2.3±0.3         | 3.7±0.1        | <b>0.007</b>                     | <b>0.0003</b> |

<sup>A</sup> Scoring was performed based on a 5-grade scale developed for each organ: 0 – total aplasia; 1 – pronounced atrophy, 2 – moderate atrophy, 3 – slight atrophy, close to normal morphology; 4 – normal morphology. Scoring criteria for individual organs are described in Supplementary Methods.

<sup>B</sup> Student's t-test vs. vehicle, 2-tailed.

<sup>C</sup> Due to thymus atrophy, fewer thymus samples were evaluated compared to other organs (N = 2, 4, and 6 for vehicle, 10 µg/kg, and 40 µg/kg groups, respectively).
