# Supplementary material for: The Toll-Like Receptor 5 Agonist Entolimod Mitigates Lethal Acute Radiation Syndrome in Non-Human Primates
Source: PubMed Central journal article supplement (PMC4569586; doi:10.1371/journal.pone.0135388), 2015-09-14
Supplement: pone.0135388.s014.pdf [file pone.0135388.s014.pdf]

**S6 Table. Semi-quantitative histological evaluation of GI tract segments from NHPs that survived to day 40 after 6.5 Gy TBI and vehicle or entolimod treatment (study Rs-06)**

| Organ/tissue    | Mean score <sup>A</sup> ± SE |                     |                |                | P-value vs. vehicle <sup>B</sup> |             |             |
|-----------------|------------------------------|---------------------|----------------|----------------|----------------------------------|-------------|-------------|
|                 | Vehicle<br>(N=2)             | Entolimod, 40 µg/kg |                |                | Entolimod, 40 µg/kg              |             |             |
|                 |                              | +16 h<br>(N=8)      | +25 h<br>(N=7) | +48 h<br>(N=8) | 16 h                             | 25 h        | 48 h        |
| <b>Duodenum</b> | 2.4±0.1                      | 3.1±0.2             | 2.9±0.2        | 3.2±0.1        | <b>0.03</b>                      | 0.07        | <b>0.01</b> |
| <b>Jejunum</b>  | 2.8±0.3                      | 3.8±0.1             | 3.6±0.1        | 3.6±0.1        | 0.21                             | 0.24        | 0.25        |
| <b>Ileum</b>    | 3.3±0.3                      | 3.6±0.1             | 3.6±0.1        | 3.7±0.1        | 0.35                             | 0.36        | 0.31        |
| <b>Cecum</b>    | 2.8±0.2                      | 3.5±0.1             | 3.6±0.1        | 3.4±0.1        | 0.11                             | <b>0.05</b> | 0.10        |
| <b>Colon</b>    | 3.6±0.3                      | 3.5±0.1             | 3.3±0.1        | 3.5±0.1        | 0.71                             | 0.46        | 0.76        |
| <b>Rectum</b>   | 3.0±0.7                      | 3.0±0.2             | 3.0±0.2        | 3.4±0.2        | 0.98                             | 0.98        | 0.64        |

<sup>A</sup> 0: severely abnormal; 1: markedly abnormal; 2: moderately abnormal; 3: mildly abnormal; 4: normal (see Supplementary Methods). Sample-average scores were calculated for each sample over evaluated histological sub-structures (villi/epithelium, crypts, lamina propria/submucosa, Brunner's glands). Mean sample-average scores per group are shown.

<sup>B</sup> Student's t-test vs. vehicle, 2-tailed.
