# Supplementary material for: The Toll-Like Receptor 5 Agonist Entolimod Mitigates Lethal Acute Radiation Syndrome in Non-Human Primates
Source: PubMed Central journal article supplement (PMC4569586; doi:10.1371/journal.pone.0135388), 2015-09-14
Supplement: pone.0135388.s015.pdf [file pone.0135388.s015.pdf]

**S7 Table. Layout of studies dedicated to assessment of entolimod effects on GI tract histopathology in the course of ARS**

| Study Number | Irradiation dose and source                         | Entolimod dose, µg/kg | Injection time relative to TBI, h | Group size | Timing of scheduled euthanasia (after TBI) |
|--------------|-----------------------------------------------------|-----------------------|-----------------------------------|------------|--------------------------------------------|
| Rs-04        | ~LD <sub>75/40</sub><br>(6.5 Gy); Co60 <sup>A</sup> | 0 (vehicle)           | +1                                | 2          | 8h                                         |
|              |                                                     | 40                    | +1                                | 2          | 8h                                         |
|              |                                                     | 0 (vehicle)           | +1                                | 2          | 5d                                         |
|              |                                                     | 40                    | +1                                | 2          | 5d                                         |
| Rs-08        | ~LD <sub>75/40</sub><br>(6.5 Gy); Co60 <sup>A</sup> | 0 (vehicle)           | +1                                | 2          | 8h                                         |
|              |                                                     | 3                     | +1                                | 2          | 8h                                         |
|              |                                                     | 10                    | +1                                | 2          | 8h                                         |
|              |                                                     | 40                    | +1                                | 4          | 8h                                         |
|              |                                                     | 100                   | +1                                | 2          | 8h                                         |
|              |                                                     | 200                   | +1                                | 2          | 8h                                         |
|              |                                                     | 0 (vehicle)           | +1                                | 2          | 5d                                         |
|              |                                                     | 3                     | +1                                | 2          | 5d                                         |
|              |                                                     | 10                    | +1                                | 2          | 5d                                         |
|              |                                                     | 40                    | +1                                | 4          | 5d                                         |
|              |                                                     | 100                   | +1                                | 2          | 5d                                         |
|              |                                                     | 200                   | +1                                | 2          | 5d                                         |
|              |                                                     | 40                    | +16                               | 2          | 5d                                         |
|              |                                                     | 40                    | +25                               | 2          | 5d                                         |
| Rs-22        | >LD <sub>95/40</sub><br>(11 Gy); LINAC <sup>B</sup> | 0 (vehicle)           | +4                                | 4          | 7d <sup>C</sup>                            |
|              |                                                     | 40                    | +4                                | 4          | 7d <sup>C</sup>                            |

<sup>A</sup> Source I: Sichuan Atomic Energy Institute, cylindrical bundle of cobalt rods

<sup>B</sup> Source III: UIC TRL, 6 MV LINAC source (Varian Clinac 2100EX)

<sup>C</sup> 10 mg/kg EdU, i.v. 1 h before euthanasia
