# Supplementary material for: The Toll-Like Receptor 5 Agonist Entolimod Mitigates Lethal Acute Radiation Syndrome in Non-Human Primates
Source: PubMed Central journal article supplement (PMC4569586; doi:10.1371/journal.pone.0135388), 2015-09-14
Supplement: pone.0135388.s016.pdf [file pone.0135388.s016.pdf]

**S8 Table. Semi-quantitative histological evaluation of GI tract sub-structures on day 7 after 11 Gy TBI and vehicle or 40 µg/kg entolimod treatment at 4 h post-TBI (study Rs-22, N=4)**

| <b>Intestinal structure</b> | <b>Vehicle score <sup>A</sup>,<br/>mean±SE</b> | <b>40 µg/kg Entolimod<br/>score <sup>A</sup>, mean±SE</b> | <b>T-test P-value<br/>(E vs. V) <sup>B</sup></b> |
|-----------------------------|------------------------------------------------|-----------------------------------------------------------|--------------------------------------------------|
| <b>MALT <sup>C</sup></b>    | 1.0±0.03                                       | 1.4±0.04                                                  | <0.0001                                          |
| <b>Lamina Propria</b>       | 1.0±0.04                                       | 1.3±0.03                                                  | <0.0001                                          |
| <b>Surface Epithelium</b>   | 1.1±0.06                                       | 1.4±0.03                                                  | <0.0001                                          |
| <b>Crypts</b>               | 1.1±0.07                                       | 1.4±0.06                                                  | <0.0001                                          |
| <b>Villi</b>                | 0.9±0.09                                       | 1.3±0.06                                                  | <0.0001                                          |

<sup>A</sup> 0: severely abnormal; 1: markedly abnormal; 2: moderately abnormal; 3: mildly abnormal; 4: normal (see Supplementary Methods).

<sup>B</sup> Student's t-test of 40 µg/kg entolimod (E) vs. vehicle (V) scores, 2-tailed.

<sup>C</sup> Mucosa-associated lymphoid tissue.
